# Supplementary material
Source: Springer Nature journal article supplement (https://www.springermedizin.de/resource/supplementary/13098_2011_114_MOESM1_ESM.pdf/9670540)

# CHMP composition

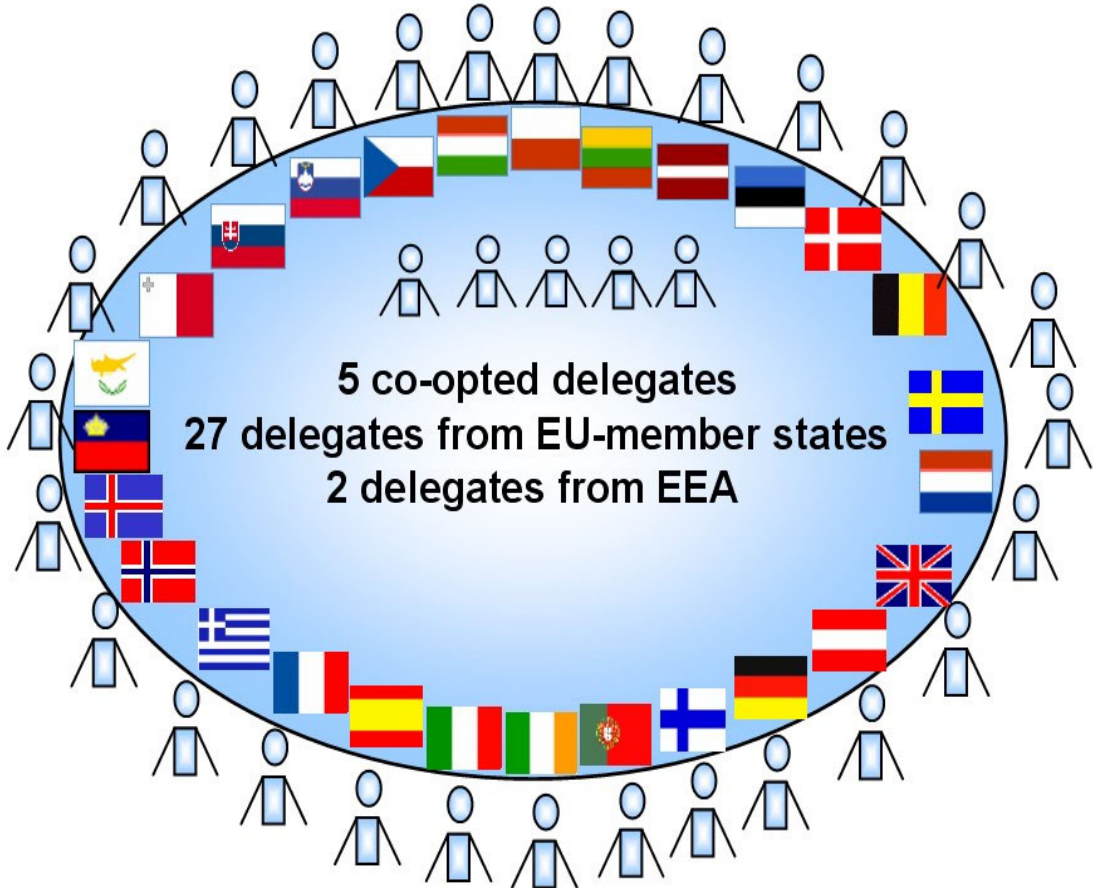

Supplement: MOESM1 [file 9670540]
